# Supplementary material
Source: Research Square preprint supplement (doi:10.21203/rs.3.rs-9140129/v1)
Supplement: Supplementary file 1 [file cd0b83cd7665fe082309745a.docx]

**Measuring Health with Mobile Phones: Survey for Spine Clinic Patients**

Dear Patient,

We are studying how mobile phones might help us understand health patterns related to spine issues and recovery. Digital phenotyping is the use of data from digital devices, like smartphones, to understand and track a person’s behavior and health. This could include physical activity, sleep, pain, and more. This survey will help us learn if patients with spine conditions would be interested in sharing this type of information. Our goal is to improve your care and track how well treatments work. This survey is optional and provides no direct benefit to you. Your answers will remain private. Thank you for helping us with our research.

Please help us by answering the following questions:

1. What is your age and gender
   1. Age (years): ________
   2. Gender:
      - Male
      - Female
      - Other
   3. What is the highest level of education you have achieved?
      - Less than high school
      - Some high school
      - High school diploma or equivalent
      - Some college (no degree)
      - Associate
      - Bachelor’s or equivalent
      - Graduate or professional (e.g. MA, MS, MBA, MD, JD, PhD)
2. Do you have a smartphone?
   1. Yes
   2. No
3. Have you heard of digital phenotyping before today?
   1. Yes
   2. No
   3. Not sure
4. Do you currently use any wearable devices or mobile phone applications that track your health (e.g., fitness trackers, smartphones, sleep monitors)?
   1. Yes
      1. If yes, please specify which device you use: ___________________________
   2. No
5. How comfortable are you with the idea of sharing health-related data collected from wearable devices or apps to help with your medical care?
   1. Very comfortable
   2. Somewhat comfortable
   3. Neutral
   4. Somewhat uncomfortable
   5. Very uncomfortable
6. Which types of data would you be willing to share with your healthcare provider to assist with your spine treatment? **(Circle all that apply)**
   1. Physical activity (e.g., steps, movement)
   2. Sleep patterns
   3. Pain levels or episodes
   4. Heart rate
   5. Stress levels
   6. Diet and nutrition
   7. Medication usage
   8. Mood and mental health
7. How often would you be willing to share data from digital devices with your healthcare provider?
   1. Daily
   2. Weekly
   3. Monthly
   4. Only during clinic visits
   5. Not willing to share data
8. How concerned are you about the privacy and security of your digital health data?
   1. Very concerned
   2. Somewhat concerned
   3. Neutral
   4. Not very concerned
   5. Not concerned at all
9. How would you prefer to provide information about your physical and mental well-being before and after surgery?
   1. I would rather fill out a paper or electronic survey and share this with my spine care team.
   2. I am willing to allow my smart phone to collect data for my spine care team.
   3. I am unwilling to share any data.
   4. I need more information.
10. If you are not willing to participate in digital phenotyping, what are your primary concerns? **(Circle all that apply)**
    1. I am willing to have this information collected
    2. Privacy of data
    3. Uncertainty about the benefits
    4. Too time-consuming
    5. Unfamiliar with technology
    6. Cost of using devices/apps
    7. Other: ___________________

Thank you for your participation!

Your input will help us determine how to best use technology to improve patient outcomes and experiences at our clinic.
