# Supplementary material
Source: Research Square preprint supplement (doi:10.21203/rs.3.rs-9140129/v1)
Supplement: Supplementary file 2 [file e8063c1aced47c5681195315.xlsx]

## Sheet: Data
Visit type	Age	Gender	Education	Smartphone ownership	Phenotyping knowledge	Current use of digital health technologies	Type	Comfort with data sharing	Physical activity	Sleep	Pain	Heart rate	Stress	Diet	Medication	Mood/mental health	Frequency	Concern about privacy	Information sharing preference	Information sharing preference (second option selected)	Willingness	Privacy of data	Uncertainty about benefits	Too-time consuming	Unfamiliar with technnology	Cost	Other	FR
Follow-up	52	Female	Graduate	Yes	No	Yes	Apple	Somewhat comfortable	Yes	Yes	Yes	Yes	Yes	Yes	No	No	Only clinic visits	Somewhat concerned	I need more information		No	Yes	No	No	No	No	No
Follow-up	73	Male	High school	Yes	No	No		Very uncomfortable	Yes	Yes	Yes	Yes	Yes	Yes	Yes	Yes	Not willing to share	Very concerned	Paper or electronic survey		No	No	No	No	Yes	No	No
Follow-up	40	Male	Graduate	Yes	No	No		Very comfortable	Yes	Yes	Yes	Yes	Yes	Yes	Yes	Yes	Daily	Neutral	I need more information		Yes	No	No	No	No	No	No
Follow-up	77	Male	Some college	Yes	Yes	Yes	Dexcom G7 & footmat	Somewhat uncomfortable	Yes	Yes	Yes	Yes	Yes	No	No	No	Non-response	Very concerned	I need more information		No	Yes	No	No	No	No	Yes	VA approval; attention paid to applicationn
Follow-up	58	Female	Associates	Yes	Yes	No		Somewhat comfortable	Yes	Yes	Yes	Yes	Yes	Yes	Yes	Yes		Very concerned	Paper or electronic survey		No	Yes	No	No	No	No	No
New patient	46	Female	Some college	Yes	No	No		Somewhat comfortable	Yes	Yes	Yes	Yes	Yes	Yes	Yes	Yes	Monthly	Somewhat concerned	Paper or electronic survey		Yes	No	No	No	No	No	No
Follow-up	63	Male	Some college	Yes	Not sure	No		Neutral	Yes	Yes	Yes	Yes	Yes	No	No	No	Only clinic visits	Not very concerned	Paper or electronic survey		No	No	Yes	No	No	No	No
New patient	48	Male	Some college	Yes	No	Yes	Not specified	Very comfortable	Yes	Yes	Yes	Yes	Yes	Yes	Yes	Yes	Only clinic visits	Very concerned	I am unwilling to share any data		No	Yes	No	No	No	No	No
New patient	46	Female	Graduate	Yes	Yes	Yes	Not specified	Somewhat comfortable	Yes	Yes	Yes	Yes	Yes	Yes	Yes	Yes	Only clinic visits	Somewhat concerned	I am willing to allow my smart phone to collect data		Yes	No	No	No	No	Yes	No
Follow-up	79	Female	Graduate	Yes	No	No		Neutral	Yes	Yes	Yes	Yes	Yes	Yes	Yes	Yes	Weekly	Neutral	I am willing to allow my smart phone to collect data		No	No	No	No	No	No	No
New patient	71	Female	Graduate	Yes	No	No		Somewhat uncomfortable	No	No	Yes	No	No	No	No	No	Only clinic visits	Very concerned	I need more information		No	Yes	No	No	No	No	No
New patient	83	Female	Graduate	Yes	No	Yes	Apple	Somewhat uncomfortable	Yes	Yes	Yes	Yes	Yes	Yes	Yes	Yes	Not willing to share	Very concerned	Paper or electronic survey	I need more information	No	Yes	Yes	Yes	Yes	No	No
Follow-up	70	Female	Bachelor	Yes	No	Yes	Apple	Neutral	Yes	No	Yes	Yes	No	No	No	No	Only clinic visits	Very concerned	Paper or electronic survey		No	Yes	Yes	No	No	No	No
New patient	73	Female	Bachelor	Yes	No	No		Neutral	Yes	Yes	Yes	Yes	Yes	Yes	Yes	Yes	Monthly	Not very concerned	I am willing to allow my smart phone to collect data		No	No	No	No	No	No	No
Follow-up	43	Male	Bachelor	Yes	No	No		Very uncomfortable	No	No	No	No	No	No	No	No	Not willing to share	Very concerned	Paper or electronic survey		No	Yes	No	No	No	No	No
Follow-up	69	Male	Some college	Yes	No	No		Somewhat uncomfortable	No	No	Yes	Yes	Yes	No	No	Yes	Only clinic visits	Very concerned	Paper or electronic survey	I need more information	No	Yes	Yes	No	Yes	No	No
Follow-up	57	Male	Some college	Yes	No	No		Very comfortable	Yes	Yes	Yes	Yes	Yes	Yes	Yes	Yes	Daily	Not concerned at all	I am willing to allow my smart phone to collect data		Yes	No	No	No	No	No	No
New patient	53	Male	Some college	Yes	Not sure	Yes	Apple	Somewhat comfortable	Yes	Yes	Yes	Yes	Yes	Yes	Yes	Yes	Weekly	Somewhat concerned	I am willing to allow my smart phone to collect data	Paper or electronic survey?	No	No	No	No	Yes	No	No
New patient	61	Female	Some college	Yes	No	No		Very uncomfortable	Yes	Yes	Yes	Yes	Yes	Yes	Yes	Yes	Not willing to share	Very concerned	Paper or electronic survey		No	Yes	No	No	Yes	No	No	Machine?
New patient	67	Female	Bachelor	Yes	No	No		Very comfortable	Yes	Yes	Yes	Yes	Yes	Yes	Yes	Yes	Weekly	Neutral	I need more information		No	No	Yes	Yes	Yes	Yes	No
Follow-up	68	Male	Bachelor	Yes	No	Yes	Fitbit	Somewhat uncomfortable	Yes	No	No	No	No	No	No	No	Only clinic visits	Very concerned	Paper or electronic survey		No	Yes	Yes	No	Yes	No	No
Follow-up	54	Female	Graduate	Yes	No	Yes	Apple watch	Very comfortable	Yes	Yes	Yes	Yes	Yes	Yes	Yes	Yes	Weekly	Neutral	I am willing to allow my smart phone to collect data		Yes	No	No	No	No	No	No
Follow-up	75	Female	Graduate	Yes	No	Yes	Apple watch	Somewhat uncomfortable	Yes	Yes	No	Yes	No	No	No	No	Weekly	Somewhat concerned	I need more information		No	Yes	Yes	No	No	No	No
New patient	45	Female	Bachelor	Yes	No	No		Neutral	No	No	No	No	No	No	No	No	Not willing to share	Somewhat concerned	Paper or electronic survey		No	Yes	No	No	No	No	No
Follow-up	84	Male	Graduate	Yes	No	Yes	Apple iphone	Neutral	Yes	No	No	Yes	No	No	Yes	No	Monthly	Very concerned	I need more information		No	Yes	No	No	No	No	No
Follow-up	73	Female	Associates	No	No	No		Very uncomfortable	No	No	Yes	No	No	No	No	No	Only clinic visits	Very concerned	Paper or electronic survey		No	Yes	No	Yes	Yes	Yes	No
New patient	68	Male	Associates	Yes	No	No		Somewhat uncomfortable	Yes	Yes	Yes	Yes	Yes	Yes	Yes	Yes	Only clinic visits	Very concerned	Paper or electronic survey		No	Yes	No	No	No	No	No
Follow-up	74	Male	Bachelor	Yes	No	No		Somewhat comfortable	No	Yes	No	Yes	No	Yes	No	No	Weekly	Very concerned	I need more information		Yes	No	Yes	No	No	No	No
New patient	65	Female	Bachelor	Yes	No	Yes	Not specified	Somewhat comfortable	Yes	Yes	Yes	Yes	Yes	Yes	No	No	Weekly	Neutral	I am willing to allow my smart phone to collect data		No	No	No	No	No	No	No
Follow-up	79	Male	Graduate	Yes	Not sure	No		Very comfortable	Yes	Yes	Yes	Yes	Yes	Yes	Yes	Yes	Weekly	Not very concerned	I am willing to allow my smart phone to collect data		Yes	No	No	No	No	No	No
Post-op	71	Male	Bachelor	Yes	No	No		Very uncomfortable	Yes	Yes	Yes	Yes	Yes	Yes	Yes	Yes	Only clinic visits	Very concerned	I need more information		No	Yes	No	No	No	No	No
Follow-up	70	Male	Graduate	Yes	No	No		Somewhat comfortable	Yes	Yes	Yes	Yes	Yes	Yes	Yes	Yes	Daily	Somewhat concerned	Paper or electronic survey		No	No	No	No	No	No	No
Follow-up	59	Male	Bachelor	Yes	No	Yes	Apple watch	Somewhat uncomfortable	No	Yes	No	Yes	No	No	Yes	No	Only clinic visits	Very concerned	I need more information		No	Yes	No	No	No	No	No
Follow-up	58	Female	Some college	Yes	Yes	Yes	Not specified	Very comfortable	Yes	Yes	Yes	Yes	Yes	Yes	Yes	Yes	Daily	Neutral	I am willing to allow my smart phone to collect data		Yes	No	No	No	No	No	No
Follow-up	30	Female	High school	Yes	No	Yes	Apple watch	Neutral	Yes	Yes	No	Yes	No	No	No	No	Weekly	Neutral	I am willing to allow my smart phone to collect data		Yes	No	No	No	No	No	No
Follow-up	75	Female	Graduate	Yes	No	No		Somewhat comfortable	No	Yes	No	No	No	No	No	No	Only clinic visits	Somewhat concerned	Paper or electronic survey		No	No	No	No	No	No	No
Follow-up	74	Female	Some college	Yes	No	No		Somewhat comfortable	Yes	Yes	Yes	Yes	Yes	Yes	Yes	Yes	Daily	Neutral	I need more information		Yes	No	No	No	No	No	No
Follow-up	25	Male	Bachelor	Yes	No	Yes	Garmin watch	Somewhat comfortable	Yes	Yes	Yes	Yes	Yes	Yes	Yes	Yes	Weekly	Not very concerned	I am willing to allow my smart phone to collect data		No	No	No	No	No	No	No
Follow-up	73	Female	Some college	Yes	No	Yes	Apple watch	Somewhat comfortable	Yes	Yes	Yes	Yes	Yes	Yes	Yes	Yes	Daily	Somewhat concerned	I am willing to allow my smart phone to collect data		Yes	No	No	No	No	No	No
New patient	62	Female	Bachelor	Yes	No	No		Very comfortable	Yes	Yes	Yes	Yes	Yes	Yes	Yes	Yes	Weekly	Somewhat concerned	I am willing to allow my smart phone to collect data	I need more information	Yes	No	No	No	No	No	No
New patient	61	Male	Graduate	Yes	No	No		Somewhat comfortable	No	No	Yes	Yes	No	No	Yes	No	Monthly	Somewhat concerned	I need more information		No	Yes	Yes	No	No	Yes	No
Follow-up	38	Female	High school	Yes	No	No		Very comfortable	Yes	Yes	Yes	Yes	Yes	No	Yes	No	Daily	Neutral	I am willing to allow my smart phone to collect data	I need more information	Yes	No	No	No	No	Yes	No
Follow-up	62	Male	Some college	Yes	Not sure	No		Neutral	No	No	Yes	No	No	No	No	No	Weekly	Somewhat concerned	I am willing to allow my smart phone to collect data	I need more information	No	Yes	No	No	No	No	No
New patient	34	Female	Bachelor	Yes	No	Yes	Apple watch	Neutral	Yes	Yes	Yes	Yes	Yes	Yes	Yes	Yes	Daily	Somewhat concerned	I am willing to allow my smart phone to collect data		Yes	No	No	No	No	No	No
Follow-up	73	Female	Graduate	Yes	Yes	No		Neutral	Yes	Yes	Yes	Yes	Yes	Yes	Yes	Yes	Weekly	Neutral	I am willing to allow my smart phone to collect data		No	No	No	No	No	No	No
Follow-up	52	Male	Some college	Yes	No	No		Very uncomfortable	Yes	Yes	Yes	Yes	Yes	Yes	Yes	Yes	Not willing to share	Very concerned	I need more information		No	Yes	No	Yes	No	Yes	Yes	Subscription
Post-op	38	Male	Some college	Yes	No	No		Very uncomfortable	Yes	Yes	Yes	Yes	Yes	Yes	Yes	Yes	Only clinic visits	Not concerned at all	Paper or electronic survey		No	No	No	Yes	No	No	No
Follow-up	88	Female	High school	No	No	Yes	CPAP, pace maker	Neutral	Yes	Yes	Yes	Yes	No	No	Yes	No	Only clinic visits	Somewhat concerned	I need more information		No	No	No	No	Yes	No	No
New patient	31	Female	Bachelor	Yes	No	No		Somewhat comfortable	Yes	Yes	Yes	Yes	No	Yes	No	No	Weekly	Somewhat concerned	I am willing to allow my smart phone to collect data	I need more information	Yes	No	Yes	No	No	No	No
Follow-up	83	Male	Some college	Yes	No	No		Very comfortable	Yes	Yes	Yes	Yes	Yes	Yes	Yes	Yes	Daily	Not very concerned	I am willing to allow my smart phone to collect data		Yes	No	No	No	No	No	No
New patient	72	Female	Some college	Yes	No	No		Somewhat comfortable	Yes	Yes	Yes	Yes	Yes	Yes	Yes	Yes	Weekly	Very concerned	I am willing to allow my smart phone to collect data		Yes	No	No	No	No	No	No
Follow-up	66	Male	Bachelor	Yes	No	No		Somewhat comfortable	Yes	Yes	Yes	Yes	Yes	Yes	Yes	Yes	Weekly	Somewhat concerned	I am willing to allow my smart phone to collect data		No	No	No	No	No	No	No
Post-op	77	Female	Bachelor	Yes	No	Yes	Apple watch	Very uncomfortable	Yes	Yes	Yes	Yes	Yes	Yes	Yes	Yes	Daily	Somewhat concerned	I am willing to allow my smart phone to collect data		Yes	Yes	No	No	No	No	No
Post-op	73	Female	Bachelor	Yes	No	Yes	Fitbit	Somewhat comfortable	Yes	Yes	Yes	Yes	Yes	Yes	Yes	Yes	Daily	Neutral	I am willing to allow my smart phone to collect data		Yes	No	No	No	No	No	No
Follow-up	54	Female	Some college	Yes	Not sure	Yes	Fitbit	Neutral	No	No	Yes	No	No	No	No	No	Weekly	Somewhat concerned	I need more information		No	Yes	No	No	No	No	No
Follow-up	79	Female	Some college	Yes	No	No		Very uncomfortable	Yes	Yes	Yes	Yes	Yes	Yes	Yes	Yes	Monthly	Not very concerned	I am willing to allow my smart phone to collect data		No	No	No	No	No	No	No
Follow-up	76	Male	Graduate	Yes	No	No		Very comfortable	Yes	Yes	Yes	Yes	Yes	Yes	Yes	Yes	Daily	Somewhat concerned	I am willing to allow my smart phone to collect data		Yes	No	No	No	No	No	No
New patient	83	Female	Some college	Yes	No	No		Somewhat comfortable	Yes	Yes	Yes	Yes	Yes	Yes	Yes	Yes	Weekly	Very concerned	Paper or electronic survey		Yes	No	No	No	No	Yes	No
New patient	48	Male	High school	Yes	No	Yes	Not specified	Somewhat comfortable	Yes	Yes	Yes	Yes	Yes	Yes	Yes	Yes	Daily	Very concerned	Paper or electronic survey		No	No	No	No	No	No	No
Follow-up	68	Male	Bachelor	Yes	No	Yes	Apple watch	Very comfortable	Yes	Yes	Yes	Yes	Yes	Yes	Yes	Yes	Daily	Neutral	I am willing to allow my smart phone to collect data		No	No	No	No	No	No	No
Follow-up	47	Female	Bachelor	Yes	No	Yes	Apple	Very comfortable	Yes	Yes	Yes	Yes	Yes	Yes	Yes	Yes	Daily	Very concerned	I am willing to allow my smart phone to collect data		No	No	No	No	No	No	No
Follow-up	51	Male	Some college	Yes	No	Yes	HR monitor	Very comfortable	Yes	Yes	Yes	Yes	Yes	Yes	Yes	Yes	Daily	Neutral	I am willing to allow my smart phone to collect data		No	No	No	No	No	No	No
Follow-up	61	Female	Some college	Yes	No	No		Very comfortable	Yes	Yes	Yes	Yes	Yes	Yes	Yes	Yes	Daily	Not very concerned	I am willing to allow my smart phone to collect data		Yes	No	No	No	No	No	No
Follow-up	57	Female	Some college	Yes	No	No		Very comfortable	Yes	Yes	Yes	Yes	Yes	Yes	Yes	Yes	Weekly	Neutral	Paper or electronic survey		No	No	No	Yes	Yes	No	No
Follow-up	66	Male	Some college	Yes	No	No		Very comfortable	Yes	Yes	Yes	Yes	Yes	Yes	Yes	Yes	Only clinic visits	Not very concerned	Paper or electronic survey		No	No	No	No	Yes	Yes	No
Follow-up	54	Male	Associates	Yes	No	Yes	Apple	Somewhat comfortable	Yes	Yes	Yes	Yes	Yes	Yes	Yes	Yes	Weekly	Somewhat concerned	Paper or electronic survey		No	Yes	Yes	Yes	No	No	No
Pre-op	70	Female	Some college	Yes	Not sure	No		Very comfortable	Yes	Yes	Yes	Yes	Yes	Yes	Yes	Yes	Daily	Not very concerned	I am willing to allow my smart phone to collect data		Yes	No	No	No	No	No	No
New patient	68	Male	Bachelor	Yes	No	No		Neutral	No	No	Yes	No	No	No	No	No	Only clinic visits	Not very concerned	Paper or electronic survey		No	No	Yes	No	Yes	No	No
New patient	79	Male	Bachelor	Yes	No	Yes	Apple watch	Very comfortable	Yes	Yes	Yes	Yes	Yes	Yes	Yes	Yes	Daily	Not concerned at all	Paper or electronic survey		No	No	No	No	No	No	No
Follow-up	82	Male	Bachelor	Yes	No	No		Somewhat comfortable	Yes	Yes	Yes	Yes	Yes	Yes	Yes	Yes	Monthly	Not very concerned	Paper or electronic survey		No	No	Yes	Yes	Yes	Yes	No
Follow-up	84	Male	High school	Yes	No	No		Very comfortable	Yes	No	Yes	Yes	No	No	No	No	Daily	Somewhat concerned	Paper or electronic survey		Yes	No	No	No	Yes	No	No
New patient	59	Female	Graduate	Yes	Not sure	Yes	Not specified	Very comfortable	Yes	Yes	Yes	Yes	Yes	Yes	Yes	Yes	Daily	Somewhat concerned	I am willing to allow my smart phone to collect data		Yes	No	No	No	No	No	No
Follow-up	51	Female	Some college	Yes	No	Yes	Fitbit	Somewhat comfortable	Yes	Yes	Yes	Yes	Yes	Yes	Yes	Yes	Daily	Not very concerned	I am willing to allow my smart phone to collect data		No	No	No	No	No	No	No
New patient	63	Female	Some high school	Yes	No	No		Somewhat comfortable	No	Yes	Yes	Yes	Yes	Yes	Yes	Yes	Weekly	Somewhat concerned	I am willing to allow my smart phone to collect data		No	No	No	No	No	No	No
Follow-up	53	Female	Graduate	Yes	No	Yes	Fitbit	Somewhat uncomfortable	Yes	Yes	Yes	Yes	Yes	Yes	Yes	Yes	Daily	Somewhat concerned	Paper or electronic survey		No	Yes	No	No	No	No	No
Pre-op	82	Male	Graduate	No	No	No		Somewhat uncomfortable	No	No	No	No	No	No	No	No	Not willing to share	Very concerned	Paper or electronic survey		No	Yes	Yes	No	Yes	No	No
Follow-up	70	Female	Some college	Yes	No	Yes	Phone, bipap	Very comfortable	Yes	Yes	Yes	Yes	Yes	Yes	Yes	Yes	Daily	Not very concerned	I am willing to allow my smart phone to collect data		No	No	No	No	No	No	No
Follow-up	72	Male	Some college	Yes	No	No		Very comfortable	No	No	Yes	No	No	No	No	No	Weekly	Somewhat concerned	I am willing to allow my smart phone to collect data		Yes	No	No	No	No	No	No
Follow-up	81	Male	Graduate	No	Not sure	No		Somewhat comfortable	Yes	Yes	Yes	Yes	Yes	Yes	Yes	Yes	Daily	Somewhat concerned	Paper or electronic survey		Yes	No	No	No	No	No	No
New patient	74	Female	High school	Yes	No	No		Very uncomfortable	Yes	Yes	Yes	Yes	Yes	Yes	Yes	Yes	Only clinic visits	Not very concerned	I need more information		No	No	No	No	No	No	Yes	Overwhelmed easily
New patient	71	Female	Some college	Yes	No	No		Neutral	Yes	No	Yes	No	Yes	Yes	No	No	Daily	Very concerned	I need more information		No	Yes	No	No	No	No	No
Follow-up	69	Male	Bachelor	Yes	No	No		Neutral	Yes	Yes	Yes	Yes	Yes	No	Yes	Yes	Weekly	Very concerned	I am willing to allow my smart phone to collect data		No	No	No	No	No	No	No
Follow-up	75	Female	Some college	Yes	No	No		Somewhat comfortable	Yes	Yes	Yes	Yes	No	Yes	Yes	No	Daily	Somewhat concerned	I am willing to allow my smart phone to collect data		No	No	No	No	No	No	No
New patient	69	Male	Some college	Yes	No	Yes	Apple watch	Very comfortable	Yes	Yes	Yes	Yes	Yes	Yes	Yes	Yes	Daily	Not concerned at all	I am willing to allow my smart phone to collect data	Paper or electronic survey?	Yes	No	No	No	No	No	No
Follow-up	79	Male	High school	Yes	No	No		Neutral	Yes	Yes	Yes	Yes	Yes	Yes	No	No	Weekly	Somewhat concerned	I am willing to allow my smart phone to collect data		No	No	Yes	No	No	No	No
New patient	30	Female	Bachelor	Yes	No	Yes	Apple watch	Neutral	Yes	Yes	Yes	Yes	No	Yes	Yes	Yes	Only clinic visits	Neutral	I am willing to allow my smart phone to collect data		No	No	Yes	No	Yes	Yes	No
Follow-up	68	Female	Graduate	Yes	Yes	Yes	Not specified	Very uncomfortable	No	No	Yes	No	No	No	Yes	No	Not willing to share	Very concerned	I need more information		No	Yes	No	No	No	No	No
Follow-up	66	Male	Bachelor	Yes	Yes	No		Neutral	Yes	Yes	Yes	Yes	Yes	Yes	Yes	Yes	Daily	Not very concerned	I am willing to allow my smart phone to collect data		No	No	No	No	Yes	No	No
Follow-up	69	Female	Some college	Yes	No	No		Very comfortable	Yes	Yes	Yes	Yes	Yes	Yes	Yes	Yes	Weekly	Not concerned at all	I am willing to allow my smart phone to collect data	Paper or electronic survey?	No	No	No	No	No	No	No
Follow-up	45	Female	Associates	Yes	No	Yes	Apple watch	Very comfortable	Yes	Yes	Yes	Yes	Yes	Yes	Yes	Yes	Weekly	Not concerned at all	Paper or electronic survey		Yes	No	No	No	No	No	No
Follow-up	73	Female	Bachelor	Yes	No	No		Very comfortable	Yes	Yes	Yes	Yes	Yes	Yes	Yes	Yes	Weekly	Somewhat concerned	I am willing to allow my smart phone to collect data		Yes	No	No	No	No	No	No
New patient	72	Female	Bachelor	Yes	No	No		Somewhat comfortable	Yes	Yes	Yes	Yes	No	No	Yes	No	Monthly	Somewhat concerned	I need more information		Yes	No	No	No	Yes	Yes	No
Follow-up	53	Female	Associates	Yes	Yes	No		Neutral	Yes	Yes	Yes	Yes	Yes	Yes	Yes	Yes	Monthly	Very concerned	Paper or electronic survey		No	Yes	No	No	No	No	No
Follow-up	79	Female	Some college	Yes	No	No		Somewhat comfortable	Yes	Yes	Yes	Yes	Yes	Yes	Yes	Yes	Daily	Not very concerned	I am willing to allow my smart phone to collect data		Yes	No	No	No	No	No	No
Follow-up	80	Male	High school	Yes	No	No		Very comfortable	Yes	Yes	Yes	Yes	Yes	Yes	Yes	Yes	Daily	Somewhat concerned	Paper or electronic survey		No	No	No	No	Yes	No	No
Follow-up	75	Female	Some college	Yes	No	No		Somewhat comfortable	Yes	No	No	Yes	Yes	No	No	No	Weekly	Neutral	I need more information		Yes	No	No	No	No	No	No
New patient	76	Female	Some college	No	No	No		Very comfortable	Yes	Yes	Yes	No	Yes	Yes	Yes	Yes	Daily	Not very concerned	Paper or electronic survey		No	No	No	No	Yes	Yes	No
New patient	57	Female	Graduate	Yes	No	No		Somewhat uncomfortable	No	No	No	No	No	No	No	No	Only clinic visits	Very concerned	I need more information		No	Yes	Yes	No	No	No	No	I prefer to be less connected not more. Technnology is too pervasive.
Follow-up	81	Female	Some college	Yes	No	No		Neutral	Yes	Yes	Yes	Yes	Yes	Yes	Yes	Yes	Non-response	Not concerned at all	Non-response		No	No	Yes	Yes	Yes	No	No
New patient	56	Female	Bachelor	Yes	No	No		Neutral	Yes	Yes	Yes	Yes	Yes	Yes	Yes	Yes	Non-response	Neutral	I need more information		No	Yes	Yes	Yes	No	No	No
Follow-up	77	Male	Graduate	Yes	No	Yes	Fitbit	Somewhat comfortable	Yes	Yes	Yes	No	No	No	No	No	Daily	Somewhat concerned	I am willing to allow my smart phone to collect data		Yes	No	No	No	No	No	Yes	Fun to see what happens
Follow-up	71	Female	High school	Yes	No	No	Previously fitbit	Somewhat comfortable	Yes	Yes	Yes	Yes	Yes	Yes	Yes	Yes	Daily	Not very concerned	I am willing to allow my smart phone to collect data		No	No	No	No	No	No	No
New patient	55	Male	Bachelor	Yes	Not sure	No		Neutral	Yes	Yes	Yes	Yes	Yes	Yes	Yes	Yes	Daily	Not concerned at all	I need more information		Yes	No	No	No	No	No	No
Follow-up	59	Male	Some college	Yes	No	No		Neutral	Yes	Yes	Yes	Yes	Yes	Yes	Yes	Yes	Only clinic visits	Neutral	Paper or electronic survey		No	No	No	No	Yes	No	No
New patient	67	Female	Some college	Yes	No	No		Somewhat uncomfortable	Yes	Yes	Yes	Yes	Yes	Yes	Yes	Yes	Only clinic visits	Very concerned	Paper or electronic survey		No	No	No	No	Yes	No	No
New patient	87	Female	Graduate	Yes	Not sure	No		Somewhat comfortable	Yes	Yes	Yes	Yes	Yes	Yes	Yes	Yes	Weekly	Somewhat concerned	Paper or electronic survey		No	No	No	No	No	No	No
Follow-up	36	Female	Bachelor	Yes	Yes	Yes	Apple watch	Somewhat comfortable	Yes	Yes	Yes	Yes	Yes	Yes	Yes	Yes	Monthly	Somewhat concerned	Paper or electronic survey		No	No	No	No	No	No	No
Follow-up	75	Female	Associates	Yes	No	No		Very comfortable	Yes	Yes	Yes	Yes	Yes	Yes	Yes	Yes	Weekly	Not concerned at all	Paper or electronic survey		Yes	No	No	No	No	No	No
Follow-up	32	Female	Associates	Yes	No	No		Somewhat uncomfortable	Yes	Yes	Yes	Yes	Yes	Yes	Yes	Yes	Only clinic visits	Neutral	Paper or electronic survey		No	No	No	Yes	Yes	No	No
New patient	69	Male	Graduate	Yes	No	Yes	Apple watch	Somewhat comfortable	Yes	Yes	Yes	Yes	Yes	Yes	Yes	Yes	Weekly	Somewhat concerned	I am willing to allow my smart phone to collect data		Yes	No	Yes	No	No	No	No
New patient	77	Male	Graduate	Yes	Yes	Yes	Apple watch	Very comfortable	Yes	Yes	Yes	Yes	Yes	Yes	Yes	Yes	Weekly	Neutral	I am willing to allow my smart phone to collect data		Yes	No	No	No	Yes	No	No
Follow-up	73	Male	Bachelor	Yes	No	No		Neutral	Yes	Yes	Yes	Yes	Yes	Yes	Yes	Yes	Not willing to share	Very concerned	Paper or electronic survey		No	Yes	Yes	Yes	Yes	Yes	No
Follow-up	58	Female	Bachelor	Yes	No	Yes	Fitbit	Somewhat comfortable	Yes	Yes	Yes	Yes	Yes	Yes	Yes	Yes	Monthly	Somewhat concerned	I am willing to allow my smart phone to collect data		Yes	No	No	Yes	No	No	No
New patient	68	Male	High school	Yes	No	Yes	Not specified	Very comfortable	No	No	Yes	Yes	No	No	No	No	Daily	Somewhat concerned	Paper or electronic survey		No	No	No	No	Yes	Yes	No
New patient	67	Female	Graduate	Yes	No	No		Somewhat uncomfortable	Yes	Yes	Yes	Yes	Yes	Yes	Yes	Yes	Non-response	Very concerned	I am willing to allow my smart phone to collect data	Paper or electronic survey?	No	Yes	No	No	No	No	No
Follow-up	90	Male	Associates	Yes	No	Yes	Samsung wearable	Very comfortable	Yes	Yes	Yes	Yes	Yes	Yes	Yes	Yes	Only clinic visits	Not concerned at all	Paper or electronic survey		Yes	No	No	No	No	No	No
New patient	67	Male	High school	Yes	No	Yes	Apple watch	Very comfortable	Yes	Yes	Yes	Yes	Yes	Yes	Yes	Yes	Daily	Not very concerned	I am willing to allow my smart phone to collect data		Yes	No	No	No	No	No	No
Follow-up	87	Female	Associates	Yes	No	No		Very comfortable	Yes	No	Yes	Yes	No	Yes	Yes	Yes	Monthly	Neutral	Paper or electronic survey		Yes	No	No	No	Yes	No	No
Follow-up	84	Male	Graduate	Yes	No	No		Very comfortable	Yes	Yes	Yes	Yes	Yes	Yes	Yes	Yes	Monthly	Somewhat concerned	I am willing to allow my smart phone to collect data	Paper or electronic survey?	No	No	No	Yes	Yes	No	No
Follow-up	75	Female	Bachelor	Yes	No	No		Very comfortable	Yes	Yes	Yes	Yes	Yes	Yes	Yes	Yes	Daily	Not concerned at all	I am willing to allow my smart phone to collect data		No	No	No	No	No	No	No
Follow-up	78	Female	Some college	Yes	No	Yes	Not specified	Neutral	Yes	Yes	Yes	No	No	No	Yes	Yes	Weekly	Somewhat concerned	I need more information		No	Yes	Yes	Yes	No	No	No
Follow-up	53	Female	Associates	Yes	Not sure	Yes	Apple watch	Very uncomfortable	Yes	Yes	Yes	Yes	Yes	Yes	Yes	Yes	Not willing to share	Very concerned	I am unwilling to share any data		No	Yes	No	Yes	No	No	No
Follow-up	67	Male	Some college	Yes	No	No		Somewhat comfortable	Yes	Yes	Yes	Yes	Yes	Yes	Yes	Yes	Daily	Somewhat concerned	I am willing to allow my smart phone to collect data		Yes	Yes	No	No	No	No	No
Post-op	71	Male	High school	No	No	No		Somewhat comfortable	Yes	Yes	Yes	Yes	Yes	Yes	Yes	Yes	Daily	Somewhat concerned	Paper or electronic survey		Yes	No	No	No	No	No	No
Follow-up	59	Male	Some college	Yes	No	No		Very comfortable	Yes	No	Yes	Yes	Yes	Yes	Yes	Yes	Weekly	Neutral	I am willing to allow my smart phone to collect data		No	No	No	No	No	No	No
Follow-up	65	Female	Associates	Yes	No	No		Very comfortable	Yes	Yes	Yes	Yes	Yes	Yes	Yes	Yes	Weekly	Somewhat concerned	Paper or electronic survey		Yes	No	No	No	No	No	No
New patient	66	Male	Associates	Yes	No	No		Neutral	Yes	Yes	Yes	Yes	Yes	Yes	Yes	No	Only clinic visits	Very concerned	Paper or electronic survey		Yes	No	No	No	No	No	No
Follow-up	64	Male	Graduate	Yes	No	No		Neutral	Yes	No	Yes	No	No	No	No	Yes	Monthly	Somewhat concerned	I am willing to allow my smart phone to collect data		No	No	No	No	No	No	No
Follow-up	84	Female	Some college	No	No	No		Very comfortable	Yes	Yes	Yes	Yes	Yes	Yes	Yes	Yes	Weekly	Non-response	Paper or electronic survey		No	No	No	No	No	No	No
Follow-up	66	Female	Graduate	Yes	No	No		Neutral	Yes	Yes	Yes	Yes	Yes	Yes	Yes	Yes	Only clinic visits	Neutral	I need more information		No	No	No	No	No	No	Yes	unspecified
New patient	84	Female	Graduate	Yes	No	No		Somewhat comfortable	Yes	Yes	Yes	Yes	Yes	Yes	Yes	Yes	Daily	Somewhat concerned	Paper or electronic survey		Yes	No	No	No	No	No	No
Post-op	67	Male	Bachelor	Yes	Yes	Yes	Realme watch	Neutral	Yes	No	No	No	No	No	No	No	Weekly	Neutral	Paper or electronic survey		Yes	No	No	No	No	No	No
Post-op	64	Male	High school	Yes	No	No		Neutral	No	No	No	No	No	No	No	No	Not willing to share	Very concerned	Paper or electronic survey		No	Yes	Yes	Yes	Yes	Yes	No
Follow-up	72	Female	Some college	Yes	No	No		Somewhat uncomfortable	No	No	No	No	No	No	No	No	Not willing to share	Somewhat concerned	I need more information		No	Yes	Yes	No	No	No	No
Follow-up	78	Female	Some college	Yes	Not sure	No		Very uncomfortable	No	No	No	No	No	No	No	No	Not willing to share	Very concerned	I need more information		No	Yes	Yes	Yes	Yes	Yes	No
New patient	72	Female	Graduate	Yes	No	Yes	Smart phone	Very comfortable	Yes	Yes	Yes	Yes	Yes	Yes	Yes	Yes	Daily	Somewhat concerned	I am willing to allow my smart phone to collect data	Paper or electronic survey?	No	No	No	No	No	No	No
Follow-up	70	Female	Graduate	Yes	No	Yes	Fitbit	Somewhat uncomfortable	No	No	No	No	No	No	No	No	Non-response	Somewhat concerned	Paper or electronic survey		No	Yes	No	No	No	No	No
Post-op	93	Female	Bachelor	Yes	No	No	Life alert	Neutral	Yes	Yes	Yes	Yes	Yes	Yes	Yes	Yes	Non-response	Neutral	Paper or electronic survey		Yes	No	No	No	No	No	No
New patient	50	Male	Bachelor	Yes	No	No		Somewhat comfortable	Yes	Yes	Yes	Yes	No	Yes	No	No	Weekly	Somewhat concerned	I am unwilling to share any data	Paper or electronic survey? I need more information	Yes	No	No	No	No	No	Yes	How would data from smart phone be transmitted to health team?
New patient	80	Male	Associates	Yes	No	Yes	Phone	Neutral	Yes	Yes	Yes	Yes	Yes	Yes	Yes	Yes	Weekly	Very concerned	Paper or electronic survey		No	Yes	No	No	No	No	No
New patient	59	Female	Bachelor	Yes	No	No		Very uncomfortable	No	No	No	No	No	No	No	No	Not willing to share	Very concerned	I need more information		No	Yes	No	No	Yes	Yes	Yes	Who would be able to use this data against me?
New patient	71	Female	Some college	Yes	No	No		Very comfortable	Yes	Yes	Yes	Yes	Yes	Yes	Yes	Yes	Weekly	Somewhat concerned	Paper or electronic survey		Yes	No	No	No	No	No	No
Follow-up	59	Male	Some college	Yes	No	No		Somewhat uncomfortable	Yes	Yes	Yes	Yes	Yes	Yes	Yes	Yes	Weekly	Somewhat concerned	I am willing to allow my smart phone to collect data		No	No	No	No	No	No	No
Post-op	72	Female	Some college	Yes	Not sure	No		Somewhat uncomfortable	Yes	Yes	Yes	Yes	Yes	Yes	Yes	Yes	Non-response	Neutral	I need more information		No	No	No	No	Yes	Yes	No
Follow-up	73	Male	Graduate	Yes	No	No		Very comfortable	Yes	Yes	Yes	Yes	Yes	Yes	Yes	Yes	Daily	Very concerned	I am unwilling to share any data		Yes	No	No	No	No	No	No
Follow-up	74	Female	Graduate	Yes	No	No		Somewhat comfortable	Yes	Yes	Yes	Yes	Yes	Yes	Yes	Yes	Monthly	Somewhat concerned	I am willing to allow my smart phone to collect data	I need more information	Yes	No	No	No	Yes	Yes	No	Do I get a new phone?
Follow-up	79	Female	Graduate	Yes	No	No		Very comfortable	Yes	Yes	Yes	Yes	Yes	Yes	Yes	Yes	Daily	Not concerned at all	Paper or electronic survey		Yes	No	No	No	No	No	No
New patient	77	Male	Bachelor	Yes	No	No		Very comfortable	Yes	Yes	Yes	Yes	Yes	Yes	Yes	Yes	Daily	Not very concerned	I am willing to allow my smart phone to collect data		Yes	No	No	No	No	No	No
Follow-up	79	Male	Graduate	Yes	No	No		Very comfortable	Yes	Yes	Yes	Yes	Yes	Yes	Yes	Yes	Weekly	Neutral	I am unwilling to share any data		No	No	No	No	No	No	No
Follow-up	73	Male	High school	Yes	Not sure	Yes	Apple watch	Very comfortable	Yes	Yes	Yes	Yes	Yes	Yes	Yes	Yes	Daily	Not very concerned	I am willing to allow my smart phone to collect data		Yes	No	No	No	No	No	No
Follow-up	43	Male	Associates	Yes	Yes	No		Somewhat comfortable	Yes	Yes	Yes	Yes	Yes	Yes	No	No	Daily	Very concerned	Paper or electronic survey	I need more information	No	Yes	No	No	No	No	No
Follow-up	71	Female	Bachelor	Yes	No	No		Neutral	Yes	Yes	Yes	Yes	Yes	Yes	Yes	Yes	Weekly	Somewhat concerned	I need more information		Yes	No	No	No	No	No	No
Post-op	62	Female	Bachelor	Yes	Yes	Yes	Not specified	Very comfortable	Yes	Yes	Yes	Yes	Yes	Yes	Yes	Yes	Weekly	Somewhat concerned	Paper or electronic survey		Yes	No	No	No	No	No	No
Follow-up	69	Male	Some college	Yes	No	No		Neutral	Yes	Yes	Yes	Yes	Yes	Yes	Yes	Yes	Weekly	Very concerned	I am willing to allow my smart phone to collect data		No	No	No	No	No	No	No
Follow-up	42	Female	Some college	Yes	No	Yes	Oura ring	Very comfortable	Yes	Yes	Yes	Yes	Yes	Yes	Yes	Yes	Daily	Neutral	I am willing to allow my smart phone to collect data		Yes	No	No	No	No	No	No
New patient	69	Female	Bachelor	Yes	No	Yes	Phone	Somewhat uncomfortable	Yes	Yes	Yes	Yes	Yes	Yes	Yes	Yes	Only clinic visits	Very concerned	I need more information		No	No	No	No	Yes	No	No
Follow-up	75	Female	Graduate	No	No	No		Somewhat comfortable	Yes	Yes	Yes	No	Yes	No	Yes	Yes	Daily	Neutral	Paper or electronic survey		No	No	No	No	No	No	No
Follow-up	72	Female	Some college	No	No	No		Very comfortable	Yes	Yes	Yes	No	No	No	No	No	Weekly	Very concerned	I am willing to allow my smart phone to collect data		No	No	No	No	No	No	No
Follow-up	74	Male	Bachelor	Yes	No	No		Very comfortable	Yes	Yes	Yes	Yes	Yes	Yes	Yes	Yes	Daily	Not very concerned	I am willing to allow my smart phone to collect data		Yes	No	No	No	No	No	No
Follow-up	76	Male	Graduate	Yes	Not sure	No		Neutral	Yes	Yes	Yes	Yes	Yes	Yes	Yes	Yes	Daily	Somewhat concerned	I am unwilling to share any data		Yes	No	No	No	No	No	No
Follow-up	47	Male	High school	Yes	No	No		Very comfortable	Yes	No	Yes	No	No	No	No	No	Daily	Neutral	I am unwilling to share any data	I need more information	No	No	No	No	Yes	No	No
Follow-up	70	Female	Graduate	Yes	No	No		Very comfortable	Yes	Yes	Yes	Yes	Yes	Yes	Yes	Yes	Daily	Not very concerned	Non-response		No	No	No	No	No	No	No
Follow-up	63	Male	Bachelor	Yes	No	No		Very comfortable	Yes	Yes	Yes	Yes	Yes	Yes	Yes	Yes	Not willing to share	Very concerned	I am unwilling to share any data		No	Yes	Yes	Yes	Yes	No	No
Follow-up	47	Male	High school	Yes	Not sure	Yes	Apple watch	Neutral	Yes	Yes	Yes	Yes	Yes	Yes	Yes	Yes	Only clinic visits	Not very concerned	I am unwilling to share any data		No	Yes	Yes	No	Yes	No	No
Follow-up	57	Female	Associates	Yes	No	Yes	Samsung watch	Somewhat comfortable	No	Yes	Yes	No	Yes	No	Yes	Yes	Only clinic visits	Non-response	I am willing to allow my smart phone to collect data	I need more information	No	Yes	No	No	No	No	No
Post-op	62	Female	Some college	Yes	No	No		Very comfortable	Yes	Yes	Yes	Yes	Yes	Yes	Yes	Yes	Weekly	Not very concerned	I am unwilling to share any data		Yes	No	No	No	No	No	No
New patient	45	Male	Some college	Yes	No	Yes	Apple watch	Somewhat uncomfortable	Yes	Yes	Yes	Yes	Yes	Yes	Yes	Yes	Weekly	Neutral	I need more information		No	No	No	No	Yes	No	No
Follow-up	79	Female	Graduate	Yes	No	No		Very comfortable	Yes	Yes	No	Yes	No	No	Yes	No	Monthly	Very concerned	I need more information		No	Yes	Yes	Yes	No	No	No
Post-op	73	Male	Bachelor	Yes	No	No		Neutral	Yes	Yes	Yes	Yes	No	No	Yes	Yes	Only clinic visits	Very concerned	Paper or electronic survey		No	Yes	No	Yes	Yes	No	No
New patient	86	Male	Bachelor	Yes	No	No		Very comfortable	Yes	Yes	Yes	Yes	Yes	Yes	Yes	Yes	Daily	Somewhat concerned	I am unwilling to share any data		No	No	No	No	No	No	No
Follow-up	75	Male	Some college	Yes	No	No		Neutral	No	No	Yes	Yes	No	No	Yes	No	Not willing to share	Somewhat concerned	Paper or electronic survey	I need more information	No	No	Yes	No	Yes	Yes	Yes	Accuracy of information?
Follow-up	77	Male	Graduate	Yes	No	Yes	CPAP	Somewhat comfortable	No	No	No	No	No	No	No	No	Non-response	Neutral	Paper or electronic survey	I need more information	No	No	No	No	No	No	No
New patient	50	Female	Some college	Yes	Not sure	No		Very comfortable	Yes	Yes	Yes	Yes	Yes	Yes	Yes	Yes	Weekly	Neutral	Paper or electronic survey	I need more information	No	No	Yes	Yes	Yes	Yes	No
Follow-up	80	Male	Graduate	Yes	Yes	Yes	Smart phone	Very comfortable	Yes	No	Yes	No	No	No	No	No	Daily	Very concerned	Paper or electronic survey		Yes	Yes	No	No	No	No	No
New patient	67	Female	Some college	Yes	No	Yes	Apple watch	Very comfortable	Yes	Yes	Yes	Yes	Yes	Yes	Yes	Yes	Weekly	Very concerned	Paper or electronic survey		Yes	No	No	No	No	No	No
New patient	69	Female	Bachelor	Yes	No	No		Very comfortable	Yes	Yes	Yes	Yes	Yes	Yes	Yes	Yes	Daily	Not very concerned	I am unwilling to share any data	Paper or electronic survey?	Yes	No	No	No	No	No	No
Follow-up	83	Female	Graduate	Yes	No	Yes	iphone	Non-response	Yes	Yes	No	No	No	No	No	No	Only clinic visits	Very concerned	I need more information		No	No	Yes	No	No	No	No
Follow-up	65	Male	High school	Yes	Not sure	No		Somewhat comfortable	Yes	No	Yes	Yes	No	Yes	Yes	No	Only clinic visits	Very concerned	Paper or electronic survey		No	Yes	No	No	No	No	No
Follow-up	58	Female	Some college	Yes	No	Yes	Samsung wearable	Very comfortable	Yes	Yes	Yes	Yes	Yes	Yes	Yes	Yes	Daily	Not very concerned	I am willing to allow my smart phone to collect data		Yes	No	No	No	No	No	No
Post-op	77	Male	Graduate	Yes	Not sure	No		Very comfortable	Yes	Yes	Yes	Yes	Yes	Yes	Yes	Yes	Weekly	Somewhat concerned	I am willing to allow my smart phone to collect data		Yes	No	No	No	No	No	No
Post-op	53	Female	High school	Yes	No	Yes	Apple watch	Very comfortable	Yes	Yes	No	Yes	Yes	No	No	Yes	Weekly	Neutral	I am willing to allow my smart phone to collect data		No	No	No	No	No	No	No
Follow-up	72	Male	Some college	Yes	No	No		Somewhat comfortable	Yes	Yes	Yes	Yes	Yes	Yes	Yes	Yes	Weekly	Neutral	Paper or electronic survey		Yes	No	No	No	No	No	No
Follow-up	72	Male	Some college	Yes	No	Yes	Hearing aids	Very comfortable	Yes	Yes	Yes	Yes	Yes	Yes	Yes	Yes	Weekly	Not very concerned	I am willing to allow my smart phone to collect data		Yes	No	No	No	No	No	No
